# Supplementary material
Source: bioRxiv or medRxiv preprint supplement (https://www.biorxiv.org/highwire/filestream/129462/field_highwire_adjunct_files/0/430090-1.pdf)
Supplement: Supplementary file [file 430090-1.pdf]

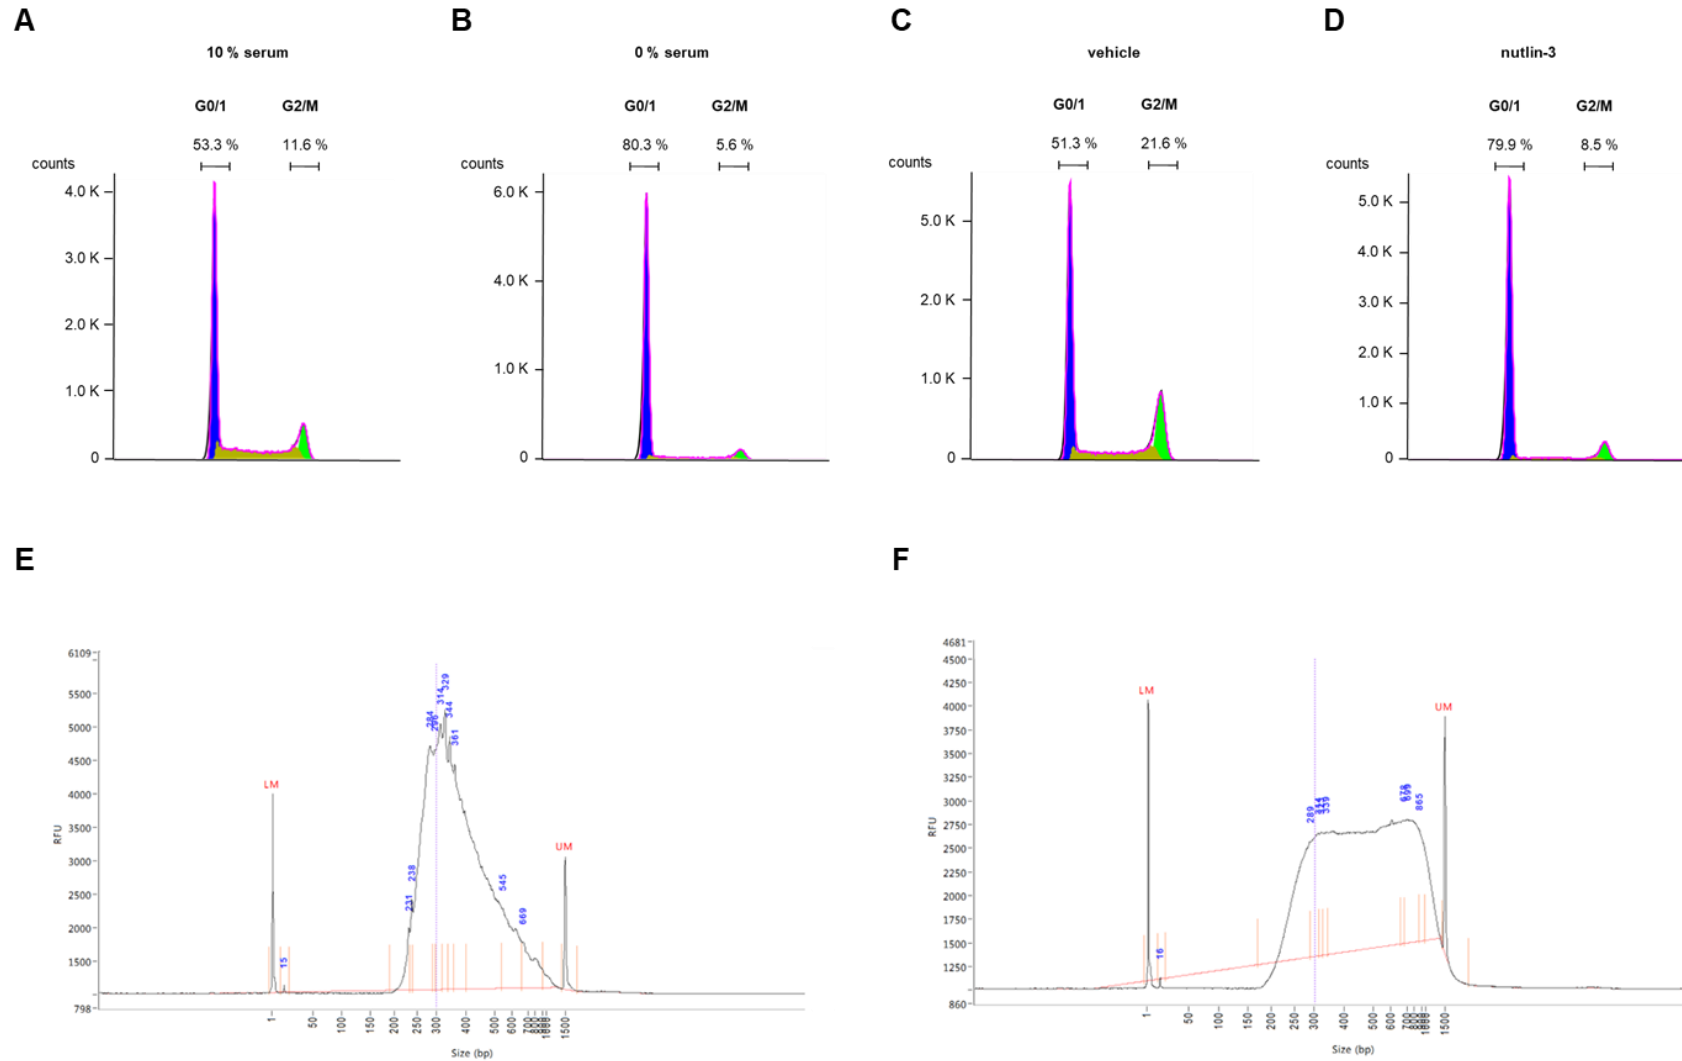

Supplementary Figure 1. Cell cycle profiles for NGP cells maintained in RPMI-1640 medium supplemented with 10 % serum (A) or 0 % serum (B) for 24 hours. Cell cycle profiles for NGP cells maintained in 0 % serum for 24 hours and treated with vehicle (C) or nutlin-3 (D) for 24 hours. Fragment analyzer profiles of a NGP total RNA library (E) and polyA[+] RNA library (F).

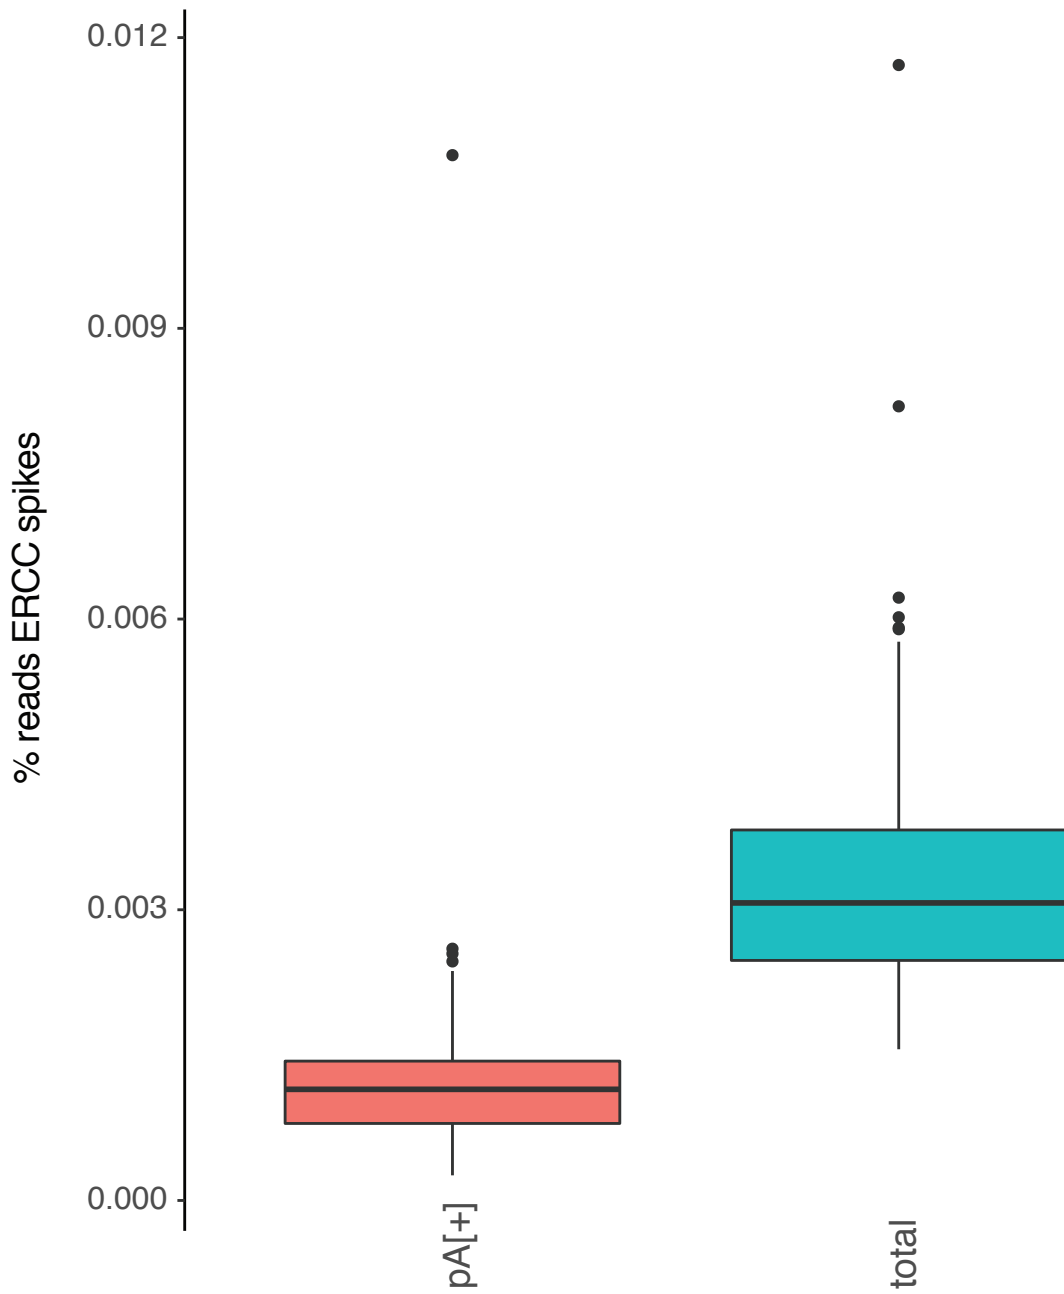

Supplementary Figure 2. The percentage of reads mapped on ERCC spikes is higher in the total RNA libraries compared to polyA[+] RNA libraries.

# ERCC log10 tpm linear model

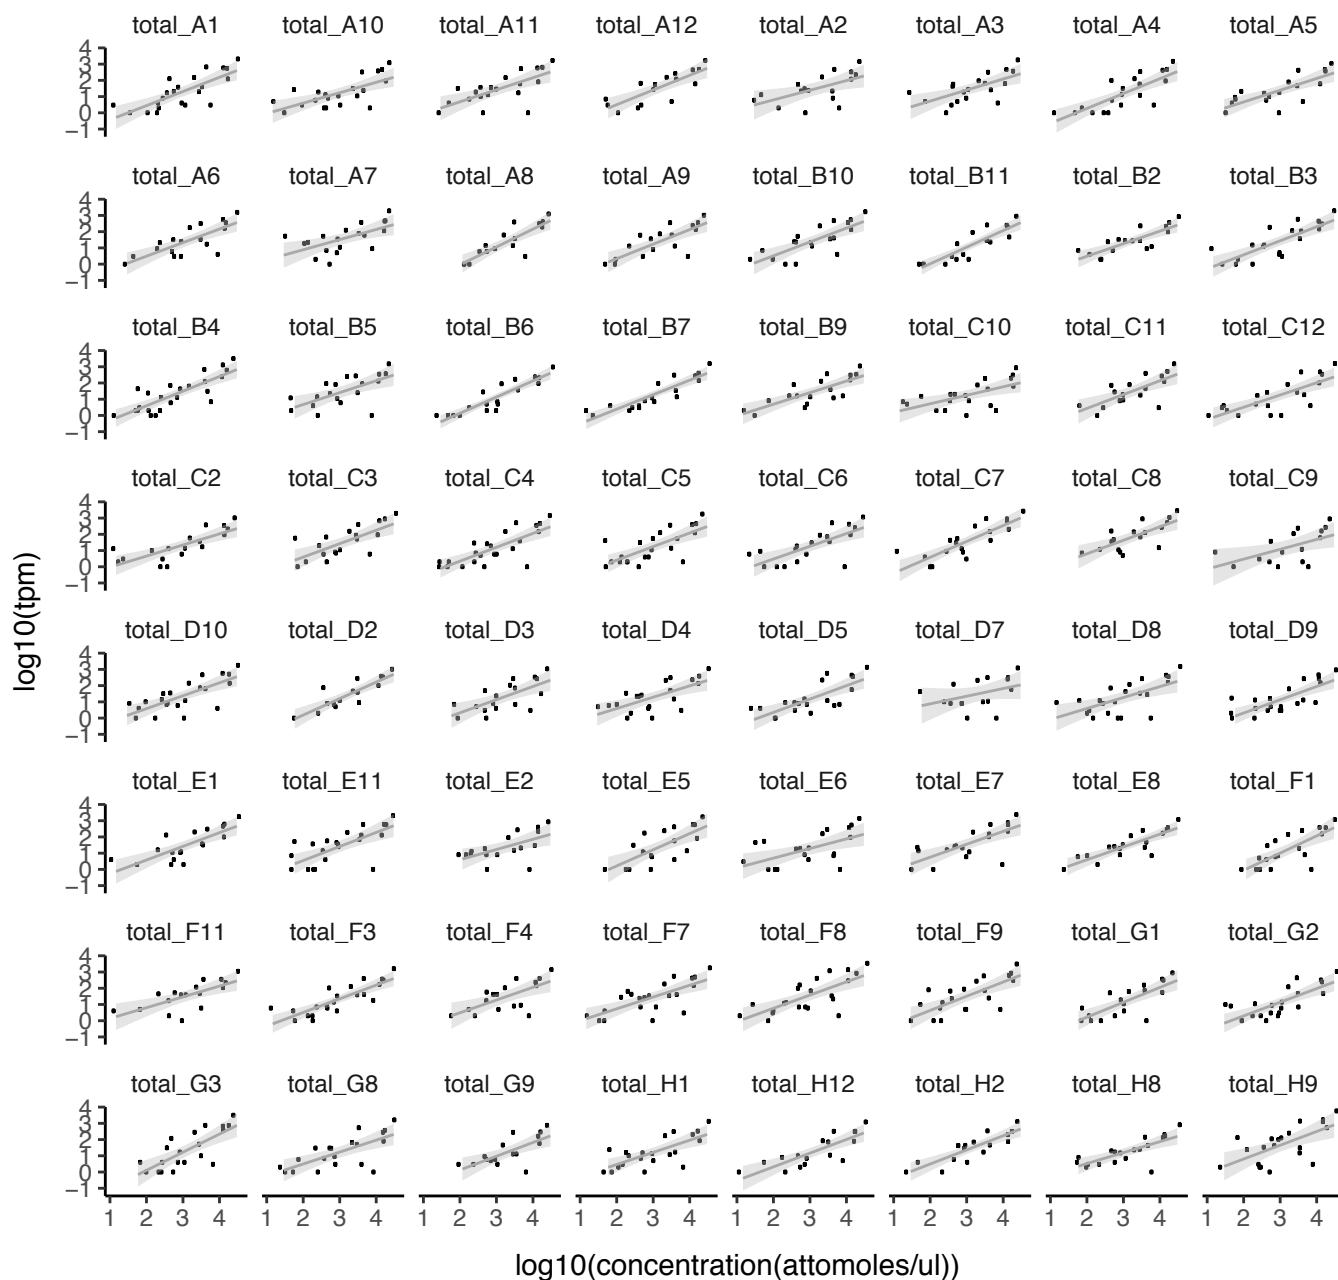

Supplementary Figure 3. Linear modeling of ERCC spike abundance demonstrates quantitative performance.

## ERCC spikes $R^2$ of linear model

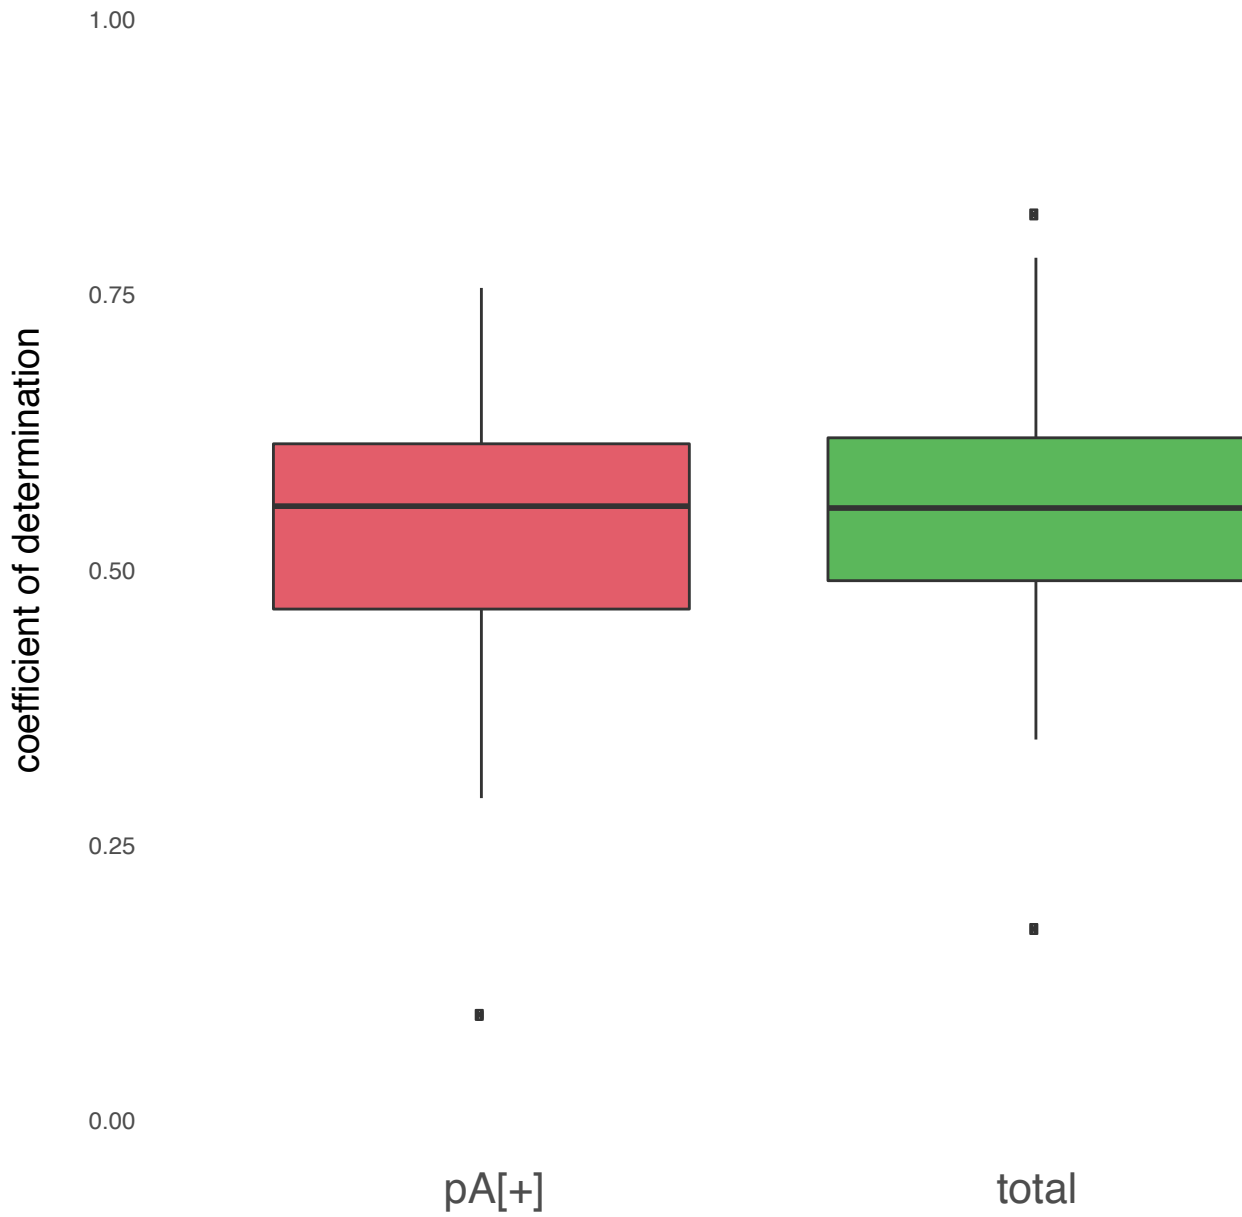

Supplementary Figure 4. The coefficients of determination obtained through linear regression of ERCC spikes are equal for polyA[+] and total RNA libraries.

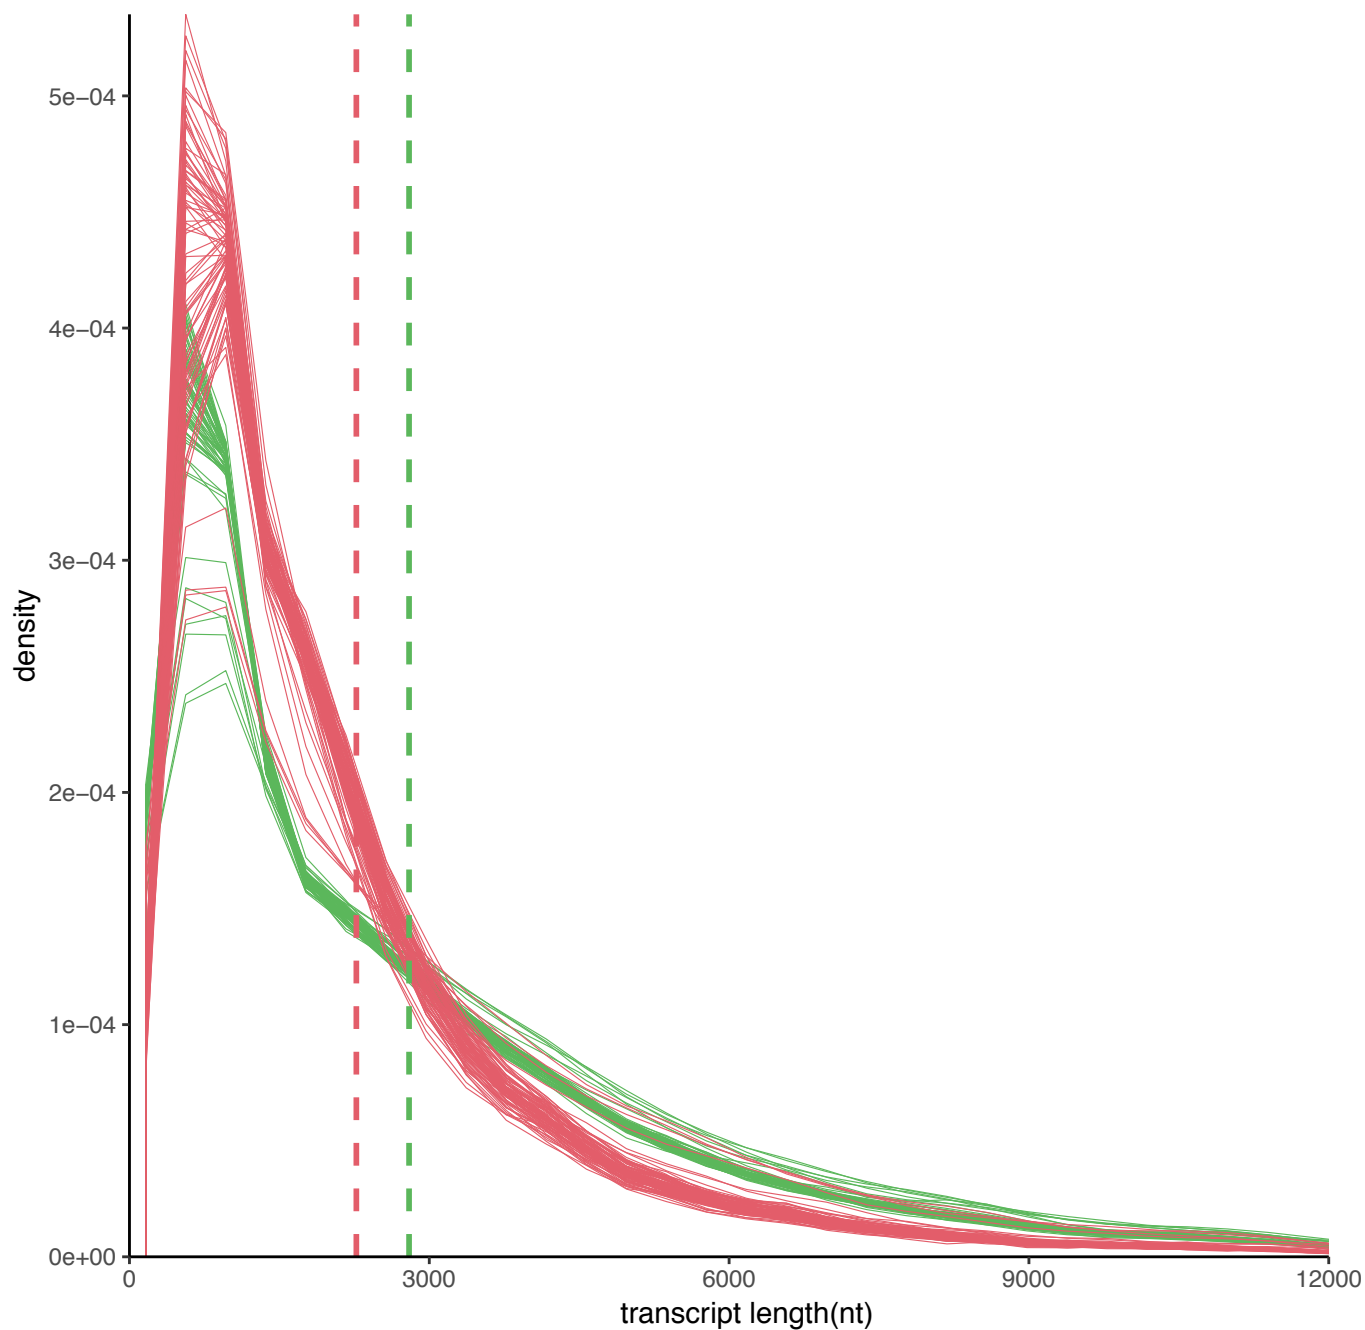

Supplementary Figure 5. The length distributions differ between polyA[+] RNA transcripts (red) and total RNA transcripts (green) per cell. PolyA[+] RNA libraries typically result in detection of shorter transcripts.

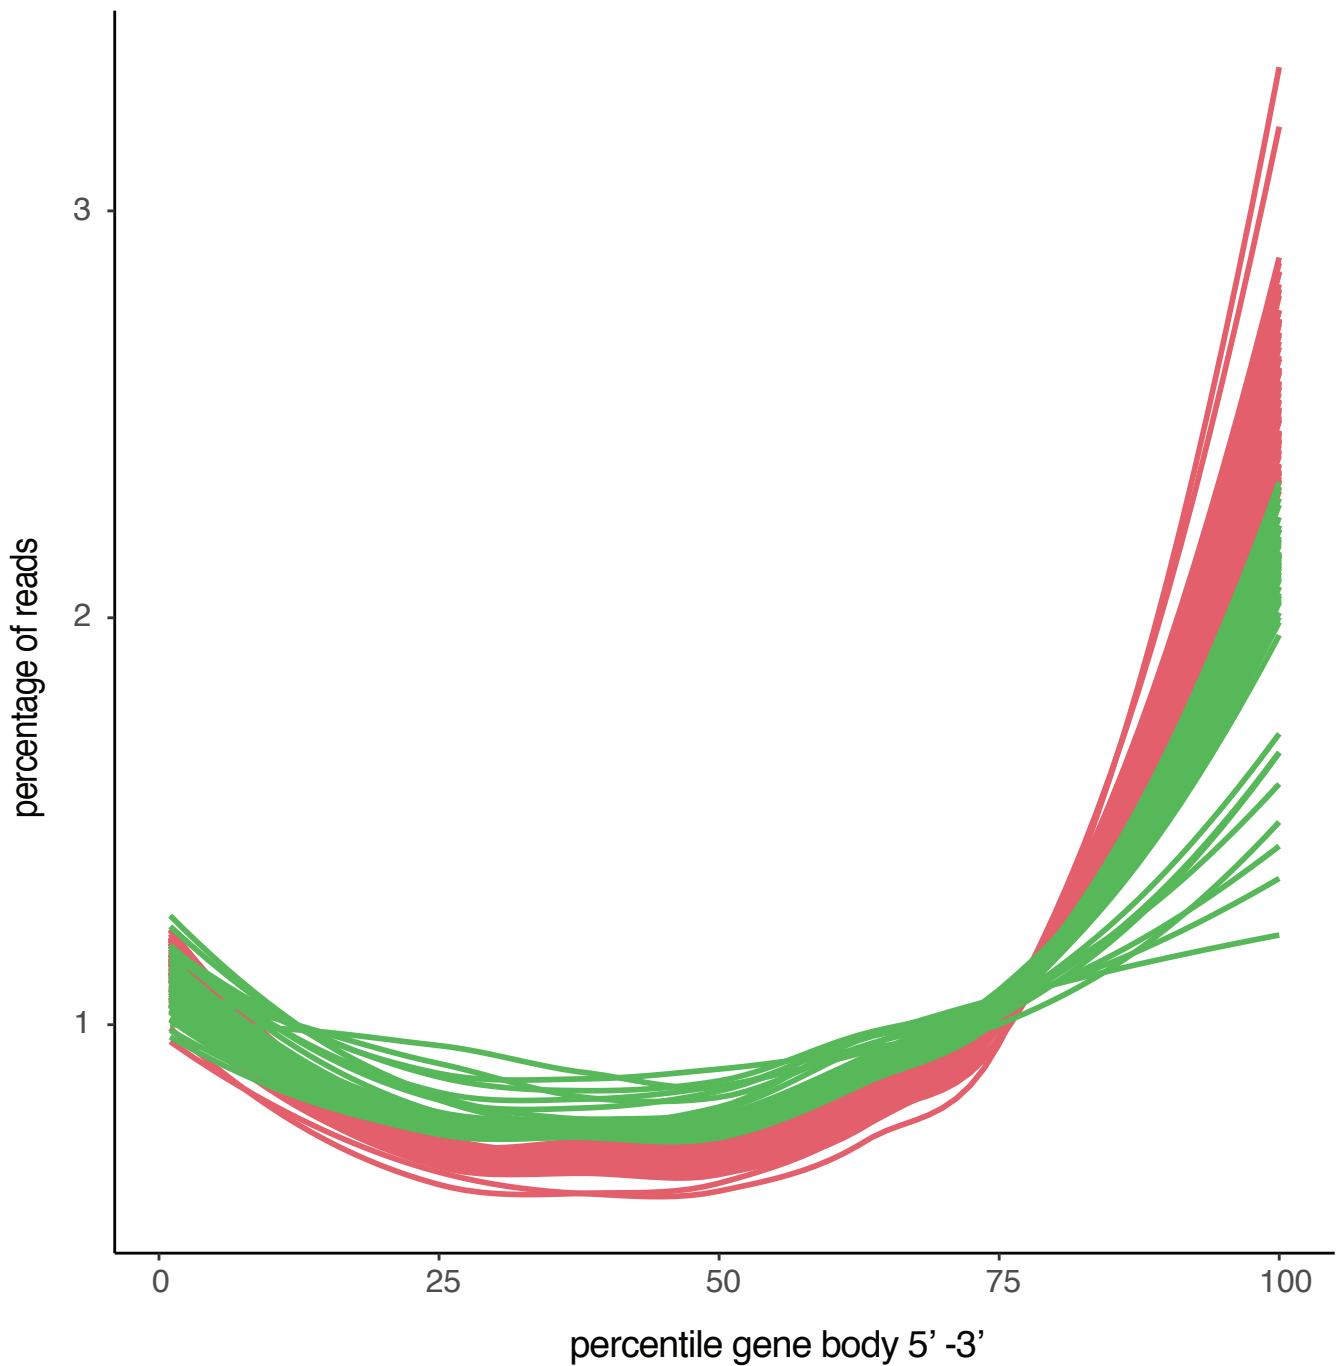

Supplementary Figure 6. The gene body coverage differs between polyA[+] RNA libraries (red) and total RNA libraries (green). Equal gene coverage would result in 1 % read fraction along the entire percentile gene body. While both library types show bias towards the 3' end, polyA[+] RNA libraries are most biased.

## Histone gene abundance

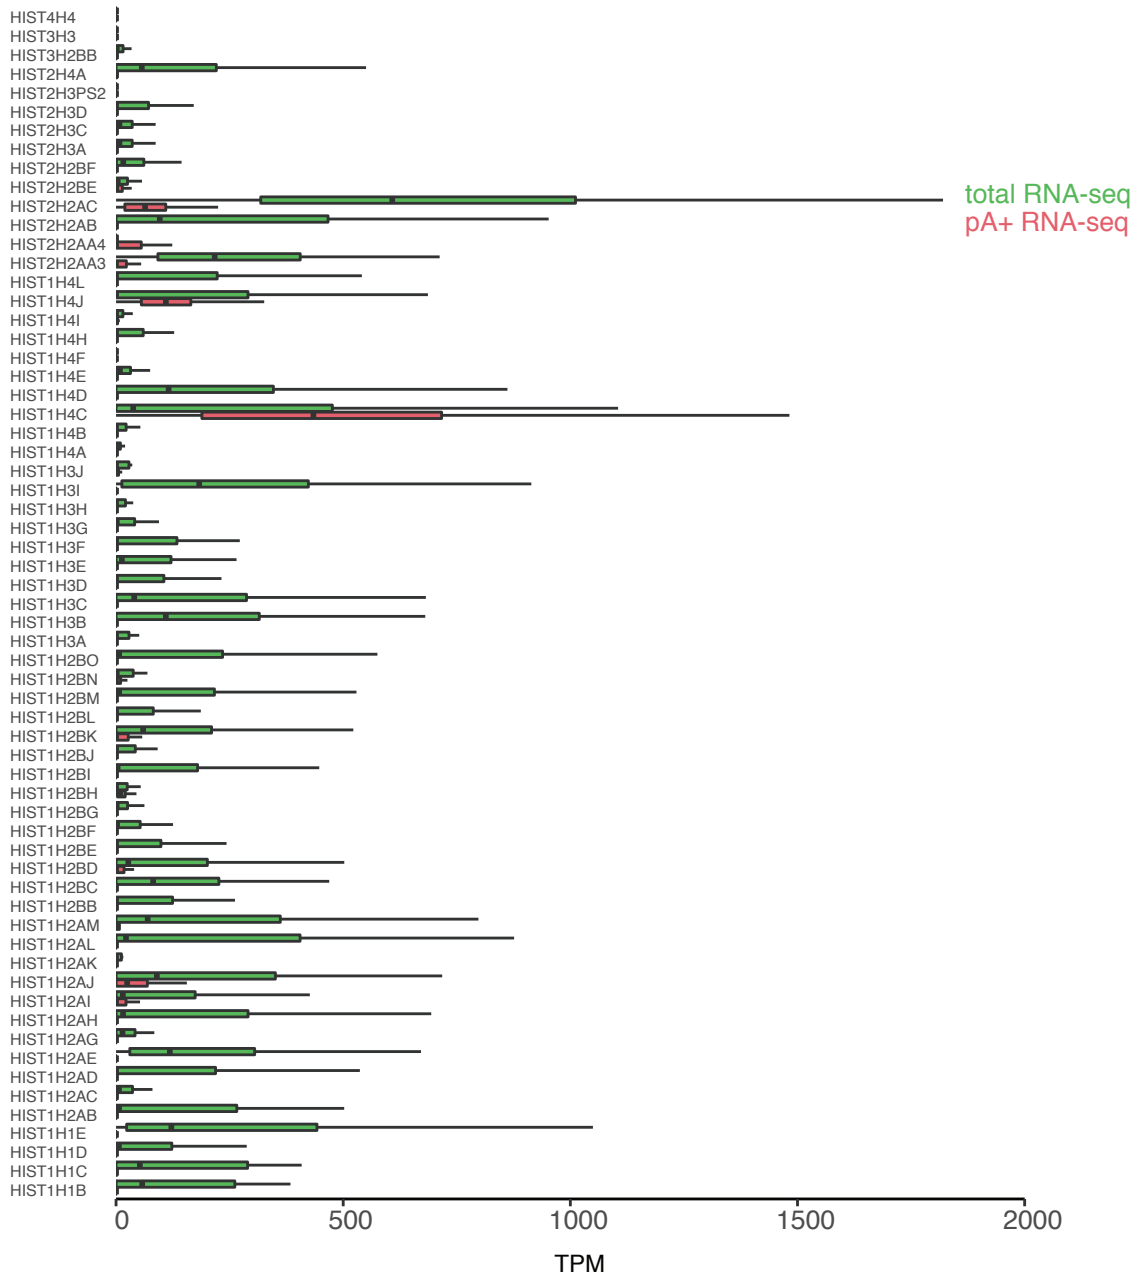

Supplementary Figure 7. TPM expression of histone genes, typically non poly-adenylated, shows that total RNA libraries (green) efficiently capture non-polyadenylated transcripts.

# SHSY5Y-MYCN-TR

# SK-N-BE-2C

A

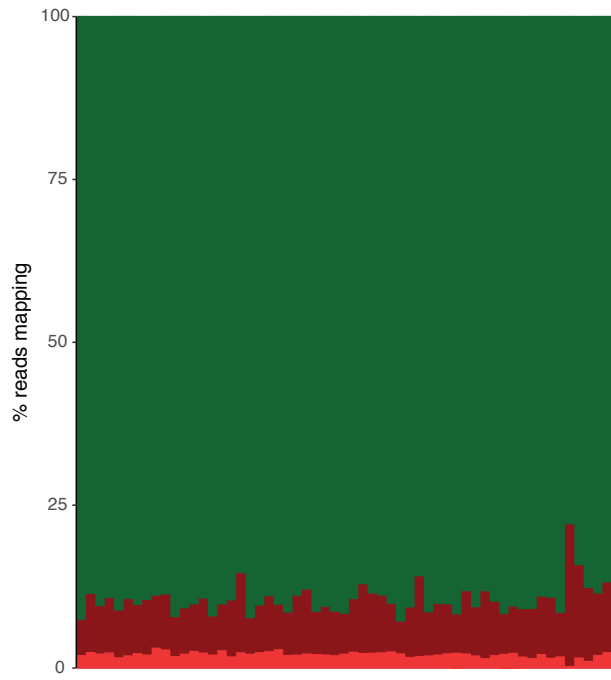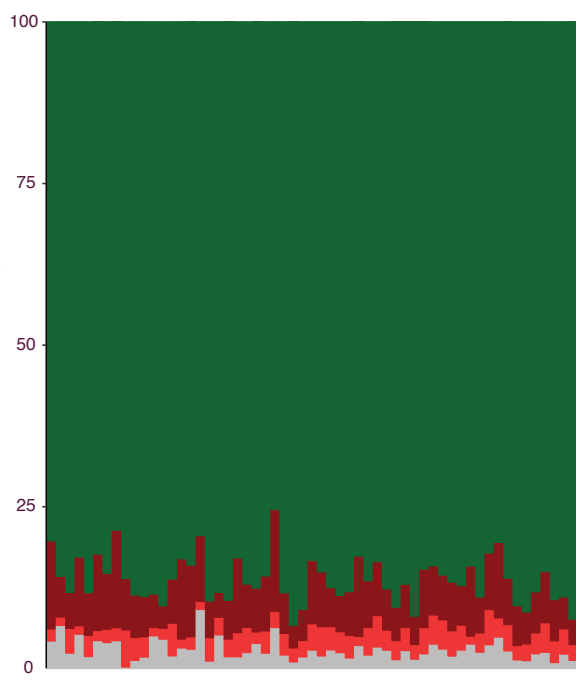

nuclear RNA  
mitochondrial RNA  
nuclear rRNA  
ERCC spikes

B

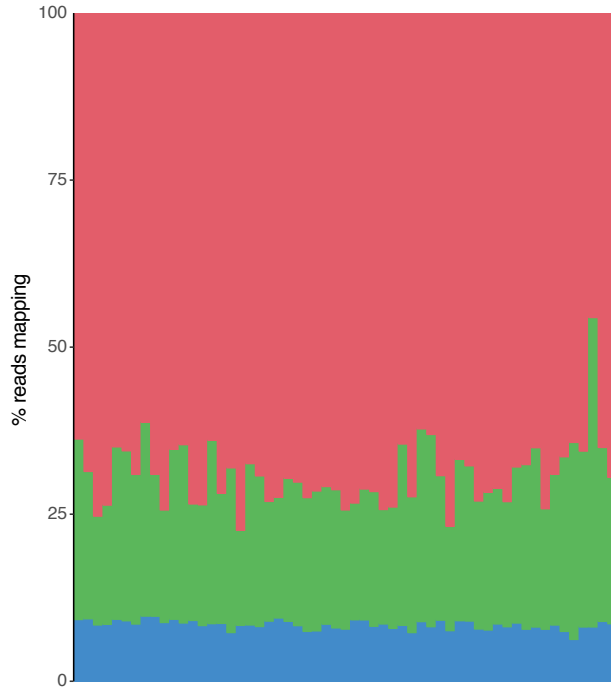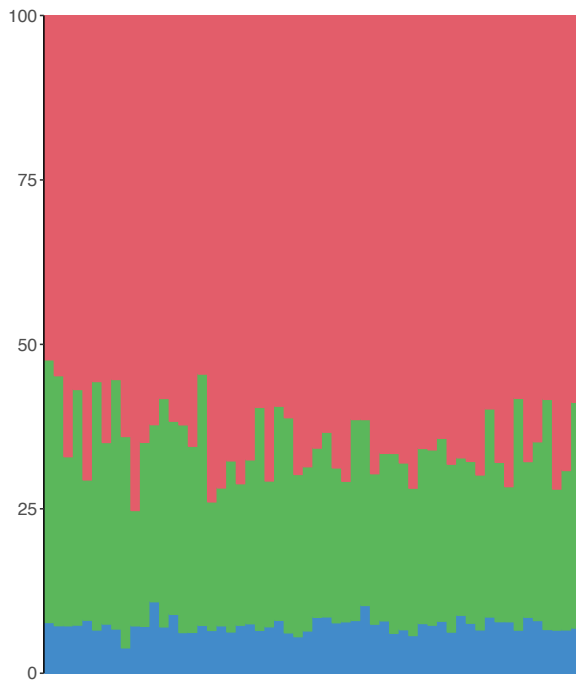

exon  
intron  
intergenic

C

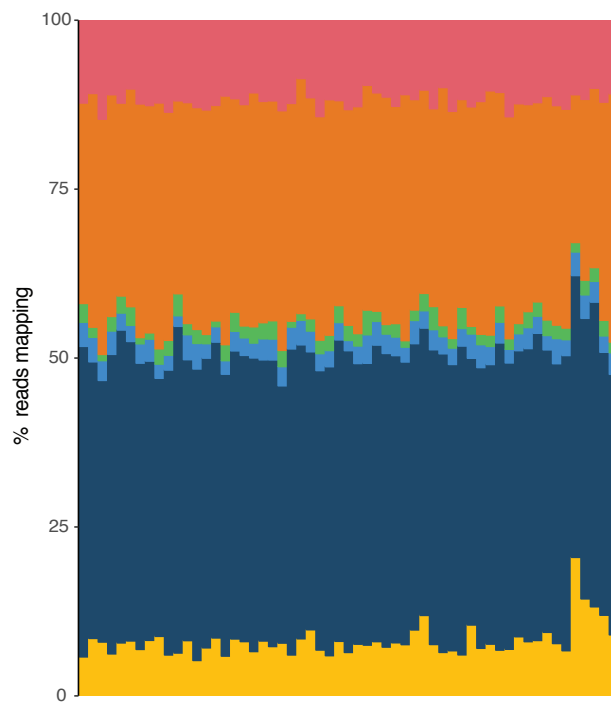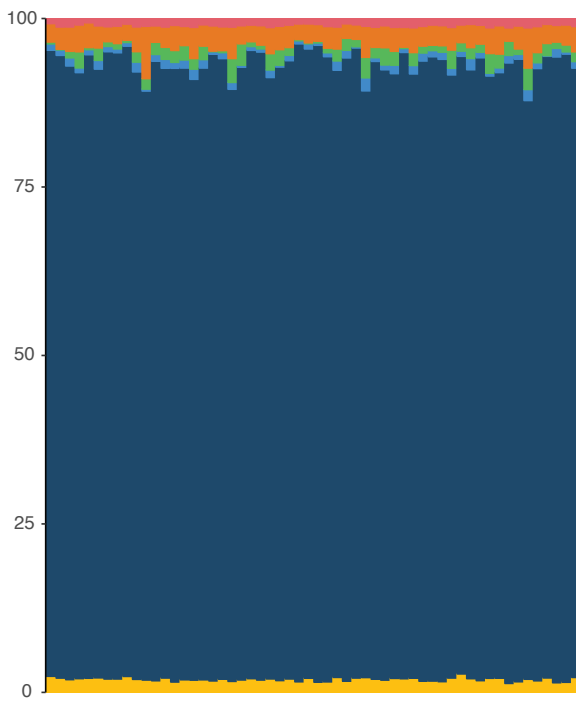

gene biotype  
antisenseRNA  
lincRNA  
misc\_RNA  
other  
protein coding  
pseudogene



Supplementary Figure 8. The QC results for total RNA libraries of SHSY5Y-MYCN-TR and SK-N-BE-2C cells are similar to NGP cells. A) Percentage of reads derived from nuclear RNA, mitochondrial RNA and ribosomal RNA per cell quantified with STAR. B) Percentage of nuclear reads derived from exonic, intronic and intergenic regions per cell quantified with STAR. C) Percentage of exonic reads attributed to the different biotypes per cell quantified with Kallisto.

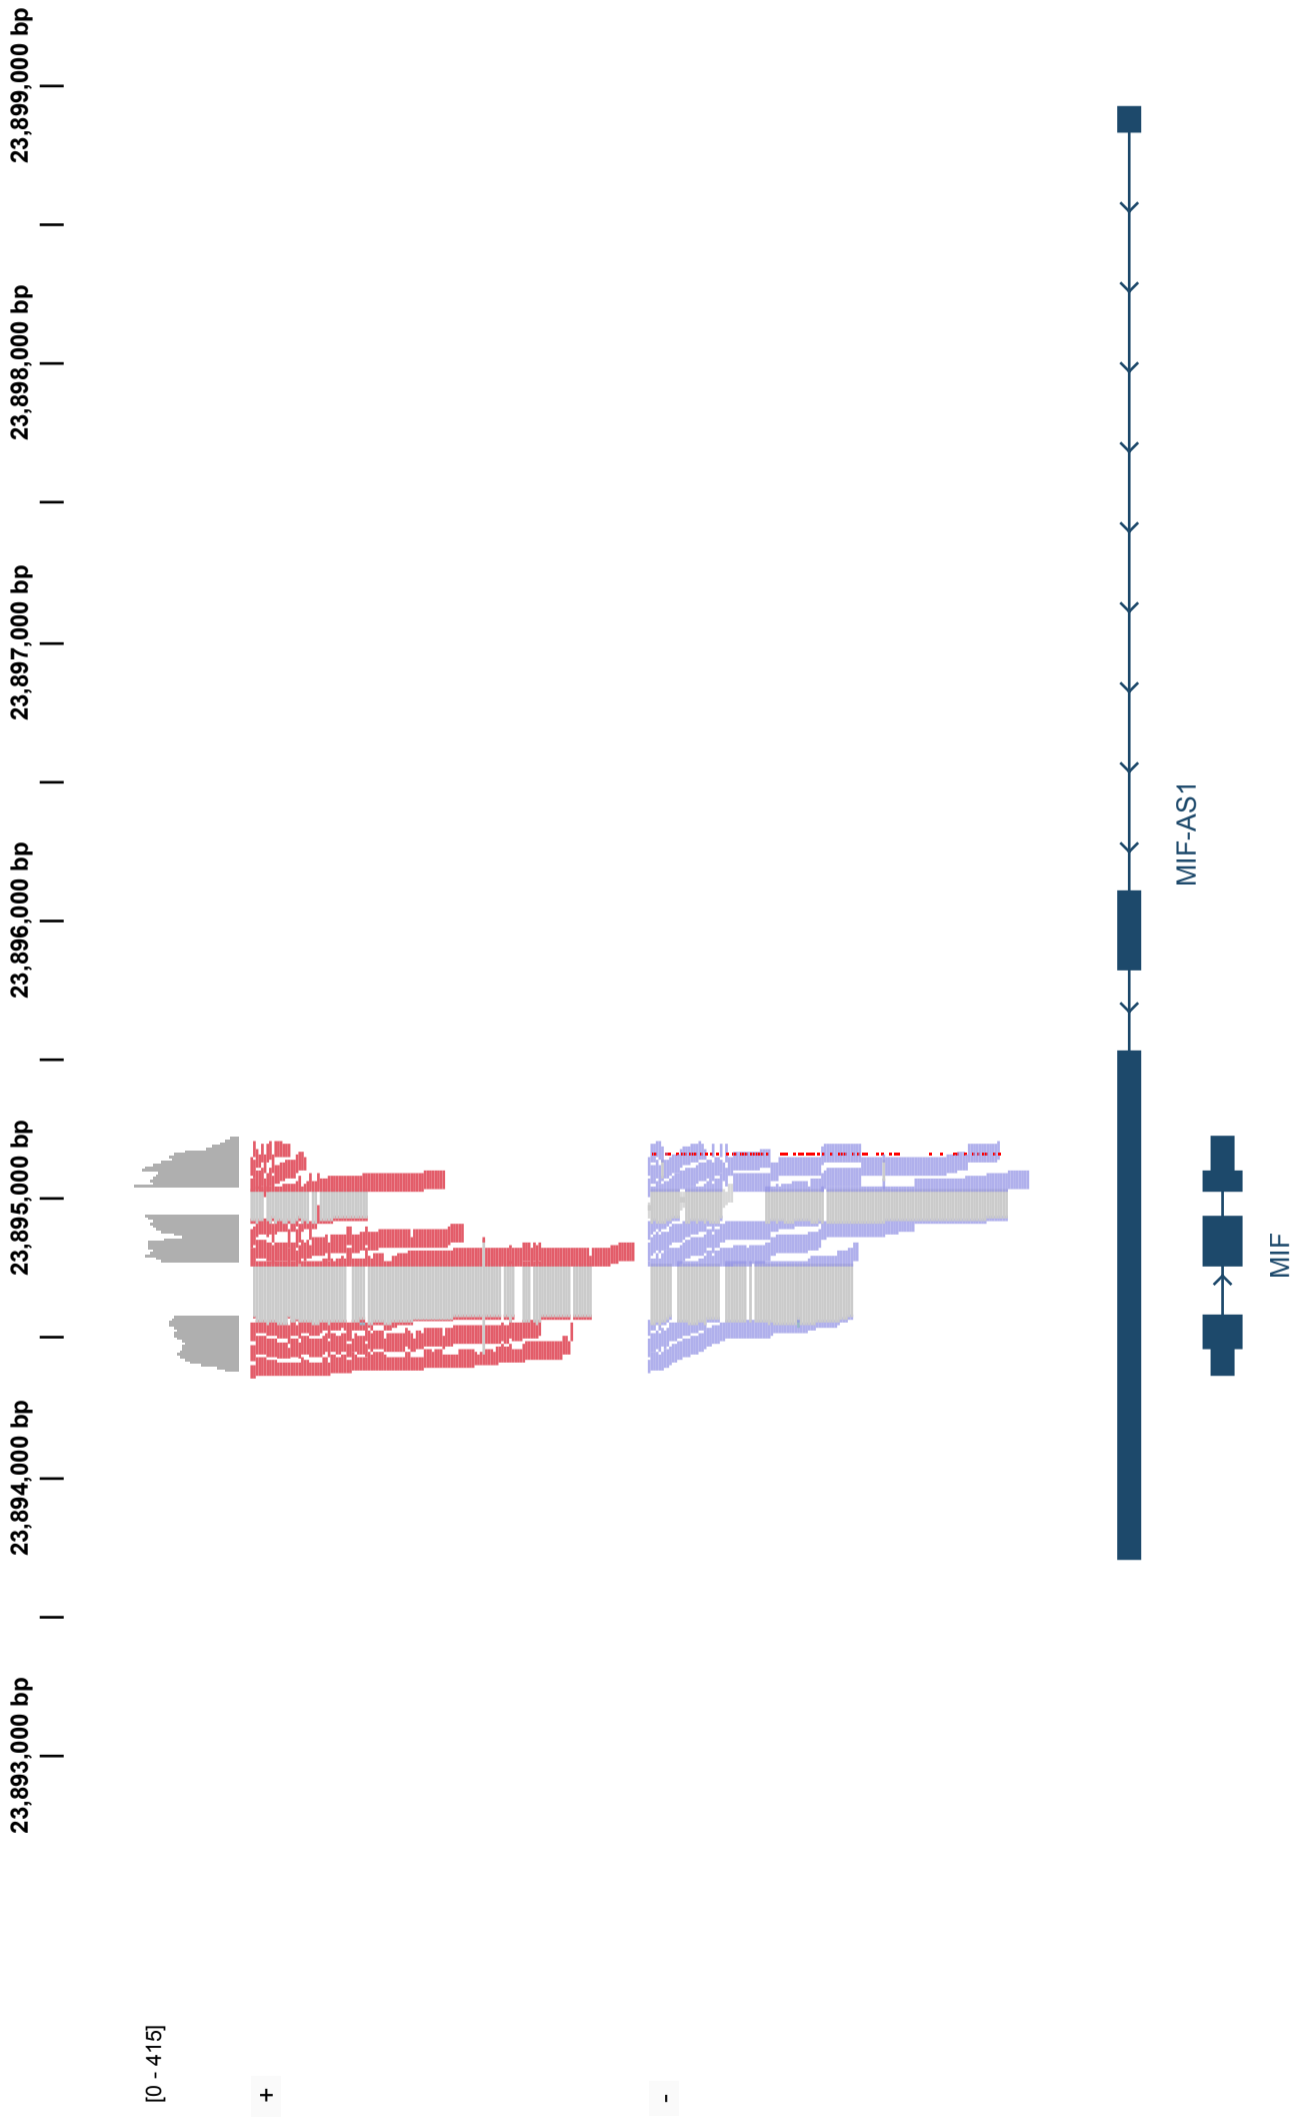

Supplementary Figure 9. IGV visualisation of sense-antisense gene pairs for polyA[+] RNA. The reads mapping on the sense (red) and antisense (blue) strand can not be unambiguously assigned to the MIF gene as the data is unstranded. While the counts will be partially mis-assigned to the MIF-AS1 gene, the reads clearly have the splice pattern of only the MIF gene.

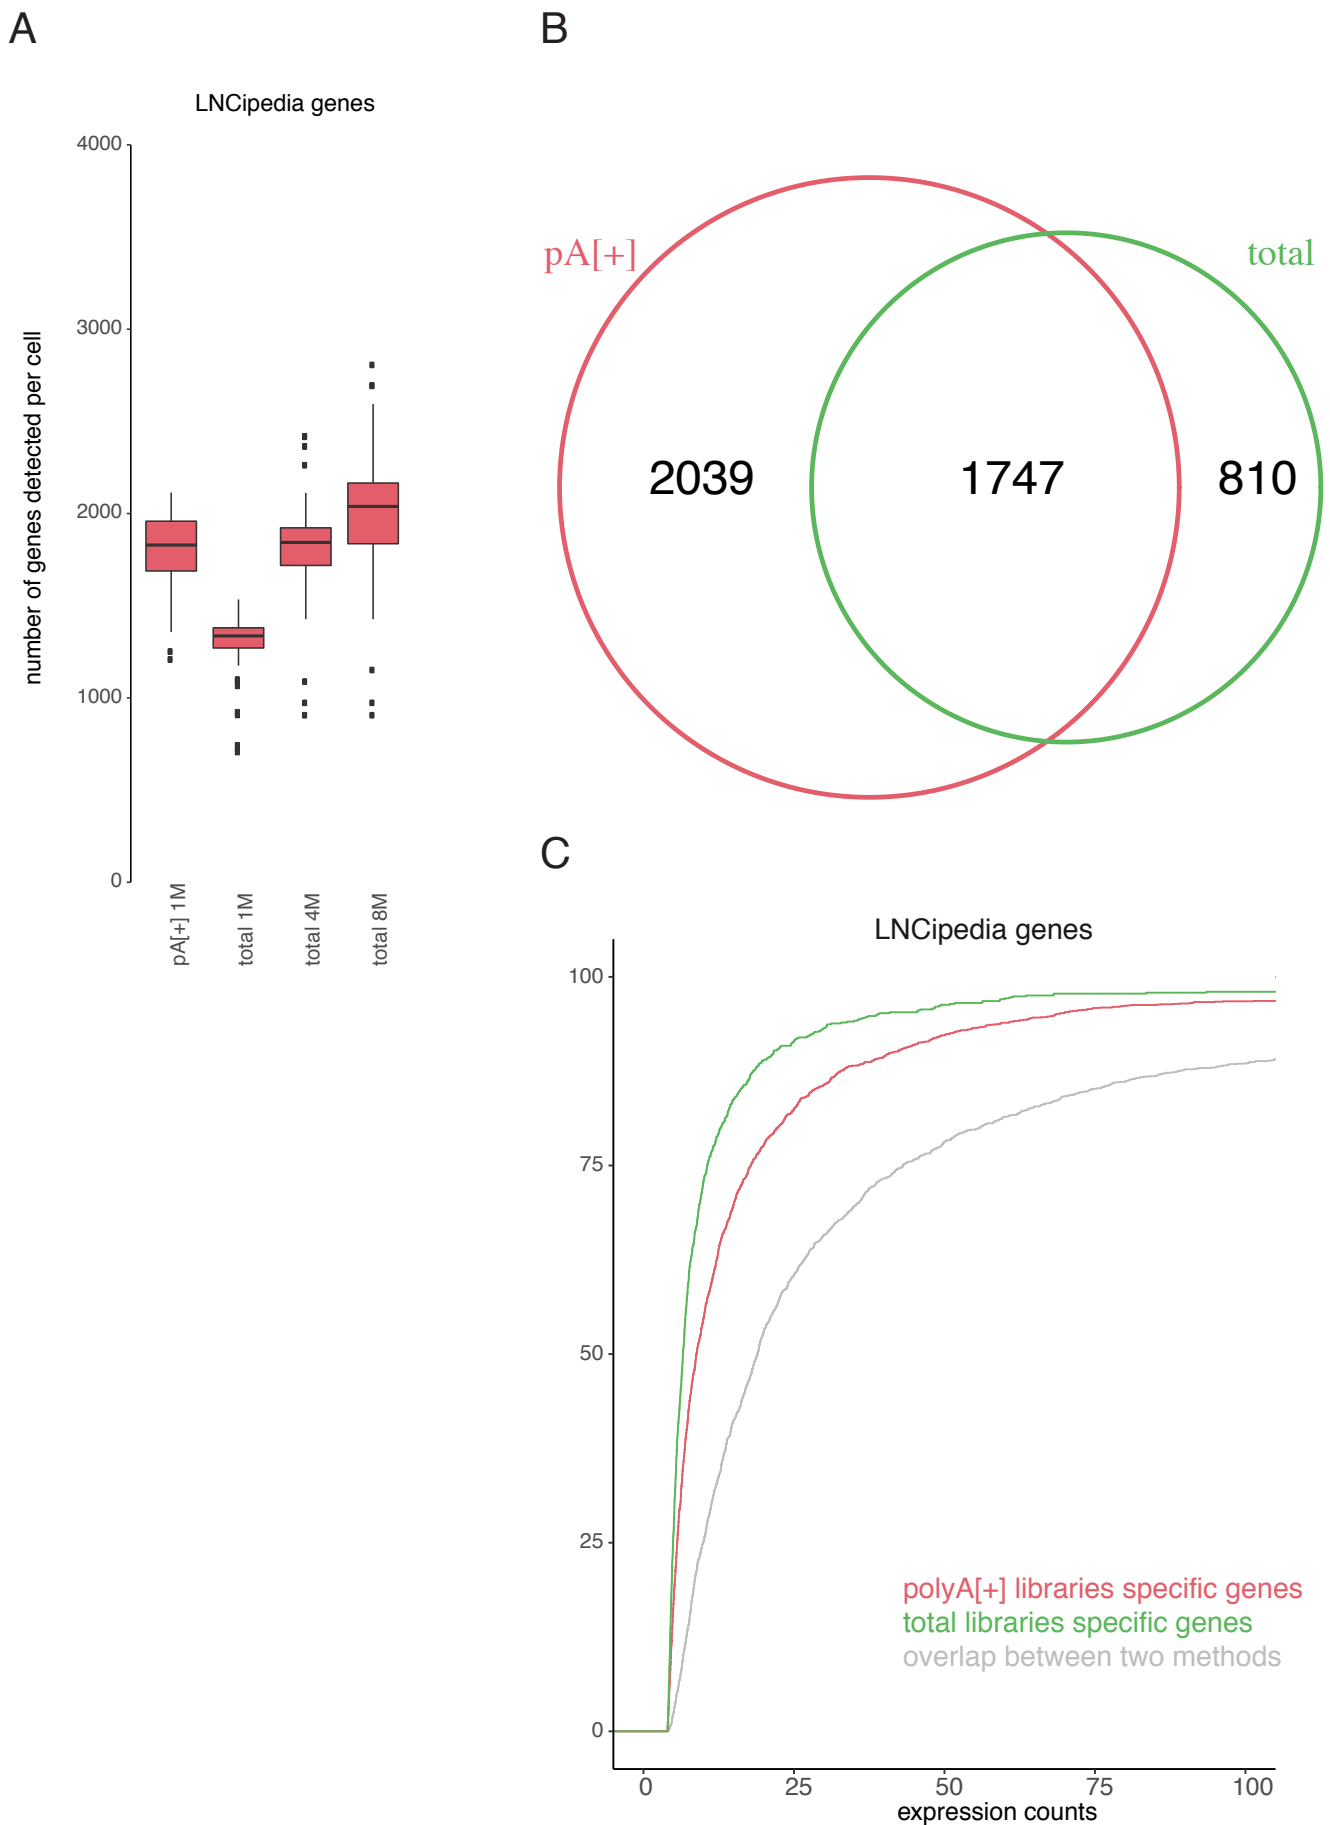

Supplementary Figure 10. By using the LNCipedia transcriptome for quantification, higher numbers of lncRNAs were discovered. (A) Number of LNCipedia genes detected in subsampled data (1, 4 and 8 million reads per cell). The proportions are equal compared to Ensembl lncRNAs overlap. (B) Overlap between lncRNAs detected in polyA[+] and total RNA libraries. (C) Expression counts for lncRNAs detected in only polyA[+] RNA libraries (red), only total RNA libraries (green) or both (gray).
